# Supplementary material for: Cutaneous Squamous Cell Carcinoma in Patients with Hidradenitis Suppurativa
Source: MDPI journal article supplement (doi:10.3390/cancers13051153), 2021-03-08
Supplement: s1 [file s1]

**Table S1.** Methodological quality assessment.

| Study        | Year | Design       | Q1 | Q2 | Q3 | Q4 | Q5 | Q6 | Q7 | Q8 |
|--------------|------|--------------|----|----|----|----|----|----|----|----|
| Anderson     | 1958 | Case series  | N  | Y  | Y  | N  | X  | X  | Y  | Y  |
| Jackman      | 1959 | Case series  | N  | Y  | Y  | N  | X  | X  | Y  | N  |
| Donsky       | 1964 | Case report  | N  | Y  | Y  | N  | X  | X  | Y  | Y  |
| Humphrey     | 1969 | Case report  | N  | Y  | Y  | N  | X  | X  | Y  | Y  |
| Gordon       | 1977 | Case report  | N  | Y  | Y  | N  | X  | X  | Y  | Y  |
| Thornton     | 1978 | Case report  | Y  | Y  | Y  | N  | X  | X  | Y  | N  |
| Alexander    | 1979 | Case report  | N  | Y  | Y  | N  | X  | X  | Y  | Y  |
| Johnston     | 1980 | Case series  | N  | Y  | Y  | N  | X  | X  | Y  | Y  |
| Mora         | 1981 | Case series  | Y  | Y  | Y  | X  | X  | X  | Y  | N  |
| Black        | 1982 | Case report  | N  | Y  | Y  | N  | X  | X  | Y  | Y  |
| Sparks       | 1985 | Case report  | N  | Y  | Y  | N  | X  | X  | Y  | Y  |
| Cr           | 1986 | Case series  | N  | Y  | Y  | N  | X  | X  | Y  | N  |
| Rosen        | 1986 | Case report  | N  | Y  | Y  | N  | X  | X  | Y  | Y  |
| Zachary      | 1987 | Case report  | N  | Y  | Y  | N  | X  | X  | Y  | Y  |
| Chicarilli   | 1987 | Case report  | N  | Y  | Y  | N  | X  | X  | Y  | Y  |
| Brown        | 1988 | Case report  | Y  | Y  | Y  | N  | X  | X  | Y  | N  |
| Martinez     | 1989 | Case report  | N  | Y  | Y  | N  | X  | X  | Y  | Y  |
| Anstey       | 1989 | Case report  | N  | Y  | Y  | N  | X  | X  | Y  | Y  |
| Weber        | 1990 | Case report  | N  | Y  | Y  | N  | X  | X  | Y  | Y  |
| Mendonca     | 1991 | Case report  | N  | Y  | Y  | N  | X  | X  | Y  | Y  |
| Williams     | 1991 | Case report  | N  | Y  | Y  | N  | X  | X  | Y  | N  |
| Welsh        | 1993 | Case report  | N  | Y  | Y  | N  | X  | X  | Y  | Y  |
| Shukla       | 1995 | Case report  | N  | Y  | Y  | N  | X  | X  | Y  | Y  |
| Perez-Diaz   | 1995 | Case report  | N  | Y  | Y  | N  | X  | X  | Y  | Y  |
| Dufresne     | 1996 | Case report  | N  | Y  | Y  | N  | X  | X  | Y  | Y  |
| Malaguarmera | 1996 | Case report  | N  | Y  | Y  | N  | X  | X  | Y  | Y  |
| Li           | 1997 | Case report  | N  | Y  | Y  | N  | X  | X  | Y  | Y  |
| Gur          | 1997 | Case series  | N  | Y  | Y  | N  | X  | X  | Y  | Y  |
| Ritz         | 1998 | Case report  | N  | Y  | Y  | N  | X  | X  | Y  | Y  |
| Nijhawan     | 1998 | Case report  | N  | Y  | Y  | N  | X  | X  | Y  | Y  |
| Lin          | 1999 | Case report  | N  | Y  | Y  | N  | X  | X  | Y  | Y  |
| Manolitsas   | 1999 | Case report  | N  | Y  | Y  | N  | X  | X  | Y  | Y  |
| Cosman       | 2000 | Case report  | N  | Y  | Y  | N  | X  | X  | Y  | Y  |
| Ishizawa     | 2000 | Case report  | N  | Y  | Y  | N  | X  | X  | Y  | Y  |
| Lapins       | 2001 | Cohort study | Y  | Y  | Y  | N  | X  | X  | Y  | Y  |
| Altunay      | 2002 | Case report  | N  | Y  | Y  | N  | X  | X  | Y  | Y  |
| Bocchini     | 2003 | Case report  | N  | Y  | Y  | N  | X  | X  | Y  | N  |
| Crain        | 2005 | Case series  | N  | Y  | Y  | N  | X  | X  | Y  | Y  |
| Rosenzweig   | 2005 | Case report  | N  | Y  | Y  | N  | X  | X  | Y  | Y  |
| Short        | 2005 | Case report  | N  | Y  | Y  | N  | X  | X  | Y  | Y  |
| Montagliani  | 2005 | Case report  | N  | Y  | Y  | N  | X  | X  | Y  | N  |
| Talmant      | 2006 | Case series  | N  | Y  | Y  | N  | X  | X  | Y  | Y  |
| Maalouf      | 2006 | Case report  | N  | Y  | Y  | N  | X  | X  | Y  | Y  |
| Maclean      | 2007 | Case series  | N  | Y  | Y  | N  | X  | X  | Y  | Y  |
| Kurokawa     | 2007 | Case series  | N  | Y  | Y  | N  | X  | X  | Y  | Y  |
| Barresi      | 2007 | Case report  | N  | Y  | Y  | N  | X  | X  | Y  | Y  |
| Constantinou | 2008 | Case series  | N  | Y  | Y  | N  | X  | X  | Y  | Y  |
| Ben Achour   | 2008 | Case report  | N  | Y  | Y  | N  | X  | X  | Y  | Y  |
| Balik        | 2009 | Case report  | Y  | Y  | Y  | N  | X  | X  | Y  | N  |
| Chandramohan | 2009 | Case report  | N  | Y  | Y  | N  | X  | X  | Y  | Y  |
| Ito          | 2009 | Case report  | N  | Y  | Y  | N  | X  | X  | Y  | Y  |
| Katz         | 2009 | Case report  | N  | Y  | Y  | N  | X  | X  | Y  | Y  |
| Miquel       | 2009 | Case report  | N  | Y  | Y  | N  | X  | X  | Y  | Y  |
| Obredor      | 2009 | Case report  | N  | Y  | Y  | N  | X  | X  | Y  | Y  |
| Lavogiez     | 2010 | Case series  | Y  | Y  | Y  | N  | X  | X  | Y  | Y  |

|                 |      |             |   |   |   |   |   |   |   |   |
|-----------------|------|-------------|---|---|---|---|---|---|---|---|
| Grewal          | 2010 | Case series | N | Y | Y | N | X | X | Y | Y |
| Vogelaar        | 2010 | Case report | N | Y | Y | N | X | X | Y | Y |
| Said            | 2010 | Case report | N | Y | Y | N | X | X | Y | N |
| Büyükasik       | 2011 | Case report | Y | Y | Y | N | X | X | Y | N |
| Losanoff        | 2011 | Case series | N | Y | Y | N | X | X | Y | Y |
| Pagliarello     | 2011 | Case report | N | Y | Y | N | X | X | Y | Y |
| Belli           | 2012 | Case series | N | Y | Y | N | X | X | Y | Y |
| Herschel        | 2014 | Case report | N | Y | Y | N | X | X | Y | Y |
| Matoso          | 2014 | Case report | Y | Y | Y | N | X | X | Y | N |
| Chang           | 2014 | Case report | N | Y | Y | N | X | X | Y | Y |
| Poh             | 2014 | Case report | N | Y | Y | N | X | X | Y | Y |
| Scheinfeld      | 2014 | Case report | N | Y | Y | N | X | X | Y | Y |
| Peña            | 2015 | Case report | N | Y | Y | N | X | X | Y | Y |
| Joglekar        | 2016 | Case report | N | Y | Y | N | X | X | Y | Y |
| Hessam          | 2016 | Case report | N | Y | Y | N | X | X | Y | Y |
| Verdelli        | 2016 | Case report | N | Y | Y | N | X | X | Y | Y |
| Jourabchi       | 2016 | Case report | N | Y | Y | N | X | X | Y | Y |
| Rekawek         | 2016 | Case report | N | Y | Y | N | X | X | Y | Y |
| Powell          | 2017 | Case report | N | Y | Y | N | X | X | Y | Y |
| Yon             | 2017 | Case series | Y | Y | Y | N | X | X | Y | Y |
| Giesey          | 2017 | Case report | N | Y | Y | N | X | X | Y | Y |
| McArdle         | 2017 | Case report | N | Y | Y | N | X | X | Y | Y |
| Zhang           | 2017 | Case report | N | Y | Y | N | X | X | Y | Y |
| Huang           | 2017 | Case report | N | Y | Y | N | X | X | Y | Y |
| Makris          | 2017 | Case report | Y | Y | Y | N | X | X | Y | Y |
| Dessinioti      | 2017 | Case report | N | Y | Y | N | X | X | Y | Y |
| Yen             | 2018 | Case report | N | Y | Y | N | X | X | Y | Y |
| Miura           | 2018 | Case report | N | Y | Y | N | X | X | Y | Y |
| Pitch           | 2018 | Case report | N | Y | Y | N | X | X | Y | Y |
| Harview         | 2018 | Case report | N | Y | Y | N | X | X | Y | Y |
| Segura Palacios | 2018 | Case report | N | Y | Y | N | X | X | Y | Y |
| Roy             | 2019 | Case report | N | Y | Y | N | X | X | Y | Y |
| Yatim           | 2019 | Case report | N | Y | Y | N | X | X | Y | Y |
| Sevray          | 2019 | Case report | N | Y | Y | N | X | X | Y | Y |
| Juviler         | 2019 | Case report | N | Y | Y | N | X | X | Y | Y |
| Kohorst         | 2019 | Case series | Y | Y | Y | N | X | X | Y | Y |

**Legend:** Y: yes, N: no, X: not assessed. **Q1.** Does the patient(s) represent(s) the whole experience of the investigator (center) or is the selection method unclear to the extent that other patients with similar presentation may not have been reported? **Q2.** Was the exposure adequately ascertained? **Q3.** Was the outcome adequately ascertained? **Q4.** Were other alternative causes that may explain the observation ruled out? **Q5.** Was there a challenge/rechallenge phenomenon? **Q6.** Was there a dose-response effect? **Q7.** Was follow-up long enough for outcomes to occur? **Q8.** Is the case(s) described with sufficient details to allow other investigators to replicate the research or to allow practitioners make inferences related to their own practice? We removed Q4, 5 and 6 because they were either not assessed or irrelevant to the included case reports and series; moreover, these questions are mostly applicable to studies reporting adverse drug events [9]. Reasons are as follows: Q4: Most cSCC are caused by chronic sun exposure; all cases of cSCC developing prior to HS or in an area unaffected by HS were excluded from this analysis. While it was not explicitly mentioned in many case reports or case series that other causes of cSCC were excluded, it is very plausible that cSCC developing in areas of long-standing HS could be secondary to chronic inflammation and aberrant wound healing pathways. Q5: A challenge/rechallenge phenomenon would not be possible to observe with the given exposure and outcome. Q6: A dose/response effect would not be possible with the given exposure and outcome.
